# Supplementary material for: Feasibility study using longitudinal bioelectrical impedance analysis to evaluate body water status during fluid resuscitation in a swine sepsis model
Source: Springer Nature journal article supplement (doi:10.1186/s40635-022-00480-5), 2022-12-06
Supplement: 40635_2022_480_MOESM1_ESM.pdf [file 40635_2022_480_MOESM1_ESM.pdf]

Online Data Supplement for

**Feasibility study using longitudinal bioelectrical impedance analysis to  
evaluate body water status during fluid resuscitation in a swine sepsis model**

Hwain Jeong, Inwon Park, Jae Hyuk Lee\*, Dongsung Kim, Sumin Baek, Seonghye Kim, You  
Hwan Jo

\* Corresponding authors. E-mail: [hyukmd@gmail.com](mailto:hyukmd@gmail.com) (J.H.L)

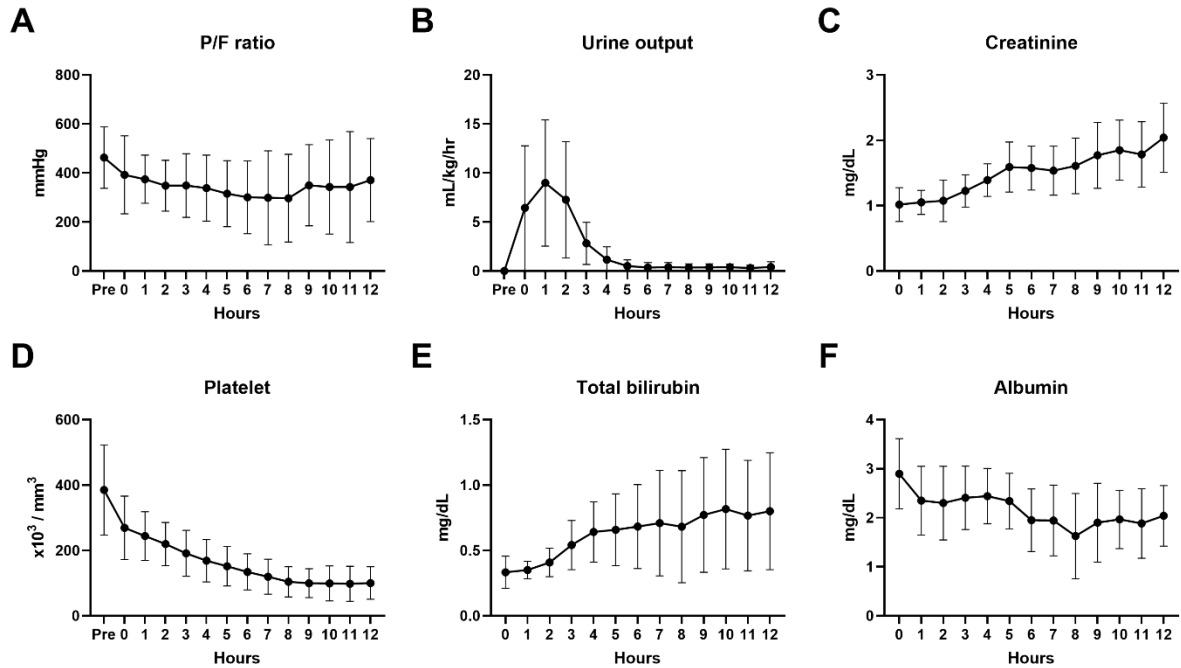

**Supplementary Figure 1.** Trends of P/F ratio, urine output, creatinine, platelet, total bilirubin and albumin levels of 12 pigs in the ESBL-producing *E. coli*-induced porcine bacteremia model. Data are presented as the means and standard error of the mean. P/F ratio: ratio of partial pressure of oxygen to the fraction of inspired oxygen.
